# Supplementary material
Source: PubMed Central journal article supplement (PMC3457619)
Supplement: peds.2012-0295_peds.2012-0295SupplementaryData.pdf [file peds.2012-0295_peds.2012-0295SupplementaryData.pdf]

# Supplemental Information

## Appendix A: Nursing Self-Practice Audit Form

### JHOC 8CVAD Maintenance Bundle

Pt's Name/Hx# \_\_\_\_\_ Date: \_\_\_/\_\_\_/\_\_\_  
 Pt DOB: \_\_\_\_\_ Line Type: \_\_\_\_\_ Admit Date: \_\_\_/\_\_\_/\_\_\_  
 RN: \_\_\_\_\_

| YES                                                                                                                                                                                                      | NO                       | NA                       | Central Venous Access Device (CVAD) & Insertion Site                                                                                                          |
|----------------------------------------------------------------------------------------------------------------------------------------------------------------------------------------------------------|--------------------------|--------------------------|---------------------------------------------------------------------------------------------------------------------------------------------------------------|
| <input type="checkbox"/>                                                                                                                                                                                 | <input type="checkbox"/> | <input type="checkbox"/> | Do you have concerns about CVAD site/function/security (eg, redness, won't draw)?                                                                             |
| <input type="checkbox"/>                                                                                                                                                                                 | <input type="checkbox"/> | <input type="checkbox"/> | If so, was it discussed w/ medical team (Mark NA if no CVL concerns/problems)                                                                                 |
| <input type="checkbox"/>                                                                                                                                                                                 | <input type="checkbox"/> | <input type="checkbox"/> | Reduction of CVL entries (draws, meds) considered/discussed with medical team (eg, PIV, IV to PO, reduced freq. of meds/labs, batching entries into one, etc) |
| <input type="checkbox"/>                                                                                                                                                                                 | <input type="checkbox"/> | <input type="checkbox"/> | All CVL insertion/dressing site(s) clean, dry, and intact?                                                                                                    |
| <input type="checkbox"/>                                                                                                                                                                                 | <input type="checkbox"/> | <input type="checkbox"/> | All dressing site(s) clearly dated/timed? (NA if no dressing)                                                                                                 |
| <input type="checkbox"/>                                                                                                                                                                                 | <input type="checkbox"/> | <input type="checkbox"/> | 100% >90% <90% NA Clave@-Scrub with EVERY CVAD entry (may mark NA if no entries)                                                                              |
| <input type="checkbox"/>                                                                                                                                                                                 | <input type="checkbox"/> | <input type="checkbox"/> | ↳ at proximal access points in circuit (e.g., CVAD, stopcocks)                                                                                                |
| <input type="checkbox"/>                                                                                                                                                                                 | <input type="checkbox"/> | <input type="checkbox"/> | ↳ at distal access points in circuit (e.g., tubing, syringe pump)                                                                                             |
| <input type="checkbox"/>                                                                                                                                                                                 | <input type="checkbox"/> | <input type="checkbox"/> | 15 Second Scrub/Prep: each entry at any access point in CVAD circuit                                                                                          |
| <input type="checkbox"/>                                                                                                                                                                                 | <input type="checkbox"/> | <input type="checkbox"/> | Hand Hygiene: each CVAD access/care preceded by hand cleaning                                                                                                 |
| <input type="checkbox"/>                                                                                                                                                                                 | <input type="checkbox"/> | <input type="checkbox"/> | Clean Gloves (non-sterile): used for each CVAD entry                                                                                                          |
| <input type="checkbox"/>                                                                                                                                                                                 | <input type="checkbox"/> | <input type="checkbox"/> | Personally minimized entering CVL circuit: as infrequently as possible                                                                                        |
| For any of above "best practices" where answer was <100%, please indicate any reason(s)                                                                                                                  |                          |                          |                                                                                                                                                               |
| <input type="checkbox"/> Pt safety / urgency <input type="checkbox"/> Too busy <input type="checkbox"/> Forgot <input type="checkbox"/> Don't believe it matters <input type="checkbox"/> Didn't know to |                          |                          |                                                                                                                                                               |
| <input type="checkbox"/> Too impractical <input type="checkbox"/> Other (please explain):                                                                                                                |                          |                          |                                                                                                                                                               |

| 1. WHAT RELATED ITEMS ARE PRESENT?          | 2. ALL DATES +TIMES CLEAR?                               | 3. ITEM CHANGED TODAY?                                                                                                                                                                               |                                    |
|---------------------------------------------|----------------------------------------------------------|------------------------------------------------------------------------------------------------------------------------------------------------------------------------------------------------------|------------------------------------|
|                                             |                                                          | NO                                                                                                                                                                                                   | YES                                |
| <input type="checkbox"/> Clave@ on CVAD hub | <input type="checkbox"/> Y<br><input type="checkbox"/> N | <input type="checkbox"/> Blood draw/blood product<br><input type="checkbox"/> N/A<br><input type="checkbox"/> Due/expired, but not done. Why?                                                        | <input type="checkbox"/> Y  OVER A |
| <input type="checkbox"/> IV Tubing          | <input type="checkbox"/> Y<br><input type="checkbox"/> N | <input type="checkbox"/> N/A                                                                                                                                                                         | <input type="checkbox"/> Y  OVER B |
| <input type="checkbox"/> CVL Dressing       | <input type="checkbox"/> Y<br><input type="checkbox"/> N | <input type="checkbox"/> Same day use only<br><input type="checkbox"/> Didn't meet criteria<br><i>q7d clear, q2d gauze, soiled loose</i><br><input type="checkbox"/> Due/expired, but not done. Why? | <input type="checkbox"/> Y  OVER C |
| <input type="checkbox"/> Port Needle        | <input type="checkbox"/> Y<br><input type="checkbox"/> N | <input type="checkbox"/> Didn't meet criteria<br><i>q7d, dislodge/infiltrated, with dressing</i><br><input type="checkbox"/> Same day use only                                                       | <input type="checkbox"/> Y  OVER D |

For any "NO" here, please either date/time (if able to determine) or replace & mark "YES" here

### JHOC CVAD Maintenance Bundle - Page 2

#### ONLY ANSWER SECTIONS FOR EQUIPMENT CHANGED

|                                                                                                                                                                                                          |                                                                                                                       |                                                                                            |
|----------------------------------------------------------------------------------------------------------------------------------------------------------------------------------------------------------|-----------------------------------------------------------------------------------------------------------------------|--------------------------------------------------------------------------------------------|
| <b>A</b>                                                                                                                                                                                                 | Clave@ (those directly attached to CVL hub) changed because:                                                          | <input type="checkbox"/> N/A <input type="checkbox"/> Uncertain when changed               |
|                                                                                                                                                                                                          | <input type="checkbox"/> Blood / blood product.                                                                       |                                                                                            |
| <b>YES</b>                                                                                                                                                                                               | <b>NO</b>                                                                                                             | <b>PROCEDURE</b>                                                                           |
| <input type="checkbox"/>                                                                                                                                                                                 | <input type="checkbox"/>                                                                                              | Sterile gloves and mask worn by care provider / assistant                                  |
| <input type="checkbox"/>                                                                                                                                                                                 | <input type="checkbox"/>                                                                                              | Clave@ connection site scrubbed with alcohol for 15s before removal of old one             |
| <input type="checkbox"/>                                                                                                                                                                                 | <input type="checkbox"/>                                                                                              | New Clave@ dated/timed documented in chart.                                                |
| <b>B</b>                                                                                                                                                                                                 | CARRIER TUBING changed because:                                                                                       | <input type="checkbox"/> N/A <input type="checkbox"/> Acuity change                        |
|                                                                                                                                                                                                          | <input type="checkbox"/> Fluid incompatibility                                                                        |                                                                                            |
| <b>YES</b>                                                                                                                                                                                               | <b>NO</b>                                                                                                             | <b>PROCEDURE</b>                                                                           |
| <input type="checkbox"/>                                                                                                                                                                                 | <input type="checkbox"/>                                                                                              | Tubing/Clave@ connection site scrubbed with alcohol for 15s before disconnection           |
| <input type="checkbox"/>                                                                                                                                                                                 | <input type="checkbox"/>                                                                                              | Changed all Claves@, connectors, stopcocks, manifolds, extensions down to CVAD hub         |
| <input type="checkbox"/>                                                                                                                                                                                 | <input type="checkbox"/>                                                                                              | Sterile/Clean gloves worn for connection of new tubing to CVAD hub                         |
| <input type="checkbox"/>                                                                                                                                                                                 | <input type="checkbox"/>                                                                                              | Mask worn by care provider / assistant for connection of new tubing to CVAD hub            |
| <b>C</b>                                                                                                                                                                                                 | CVAD DRESSING changed because:                                                                                        | <input type="checkbox"/> 7 days since last transparent dressing <input type="checkbox"/>   |
|                                                                                                                                                                                                          | <input type="checkbox"/> Dressing soiled / loose / damp <input type="checkbox"/>                                      |                                                                                            |
| <b>YES</b>                                                                                                                                                                                               | <b>NO</b>                                                                                                             | <b>PROCEDURE</b>                                                                           |
| <input type="checkbox"/>                                                                                                                                                                                 | <input type="checkbox"/>                                                                                              | Site shielded from sources of patient contamination (e.g., mask face, drape trach/pubis)   |
| <input type="checkbox"/>                                                                                                                                                                                 | <input type="checkbox"/>                                                                                              | Securing method (e.g., suture) verified and satisfactory (if problem, notify MD to secure) |
| <input type="checkbox"/>                                                                                                                                                                                 | <input type="checkbox"/>                                                                                              | Hand hygiene performed immediately before dressing change                                  |
| <input type="checkbox"/>                                                                                                                                                                                 | <input type="checkbox"/>                                                                                              | Sterile gloves worn for dressing change                                                    |
| <input type="checkbox"/>                                                                                                                                                                                 | <input type="checkbox"/>                                                                                              | Masks worn by care provider / assistant for dressing change                                |
| <input type="checkbox"/>                                                                                                                                                                                 | <input type="checkbox"/>                                                                                              | Site cleansed with CHG friction rub for 30s plus 60s air-dry (if CHG not used, why?)       |
| <input type="checkbox"/>                                                                                                                                                                                 | <input type="checkbox"/>                                                                                              | New dressing dated/timed prior to this prompt (if not, please mark "No" then date/time)    |
| <b>D</b>                                                                                                                                                                                                 | NEEDLE changed because:                                                                                               | <input type="checkbox"/> Same day use only                                                 |
|                                                                                                                                                                                                          | <input type="checkbox"/> 7 days since last changed <input type="checkbox"/> Dressing loosened/soiled                  |                                                                                            |
|                                                                                                                                                                                                          | <input type="checkbox"/> Needle dislodged / infiltrated <input type="checkbox"/> Needle change past-due by ___ # days |                                                                                            |
| <b>YES</b>                                                                                                                                                                                               | <b>NO</b>                                                                                                             | <b>PROCEDURE → complete "C" above for dressing change component!</b>                       |
| <input type="checkbox"/>                                                                                                                                                                                 | <input type="checkbox"/>                                                                                              | Date/time of new needle noted in some manner... prior to this prompt (if not, please do)   |
| ...AND...                                                                                                                                                                                                |                                                                                                                       |                                                                                            |
| <b>?</b>                                                                                                                                                                                                 | For any of above "best practices" where answer is NO, please indicate any reason(s)                                   |                                                                                            |
| <input type="checkbox"/> Pt safety / urgency <input type="checkbox"/> Too busy <input type="checkbox"/> Forgot <input type="checkbox"/> Don't believe it matters <input type="checkbox"/> Didn't know to |                                                                                                                       |                                                                                            |
| <input type="checkbox"/> Too impractical <input type="checkbox"/> Other (please explain):                                                                                                                |                                                                                                                       |                                                                                            |

All comments/insights welcome! Completed forms Cindy Herpst 1/14/11

**Appendix B: Mini-Root Cause Analysis Form**

|                   |        |                 |
|-------------------|--------|-----------------|
| Patient           | MR No: | Admit Date      |
| Diagnosis:        |        | Infection Date: |
| Disease stage:    |        | Organism:       |
| Remission Status: |        | Criteria:       |

|                                                   | CVC Insertion (date, type, where inserted)                                                                                                                                                                                                                     | Date CVC Removed | Insertion Site | Maximum sterile barriers, large drape, 2-minute skin prep followed by air drying |
|---------------------------------------------------|----------------------------------------------------------------------------------------------------------------------------------------------------------------------------------------------------------------------------------------------------------------|------------------|----------------|----------------------------------------------------------------------------------|
|                                                   |                                                                                                                                                                                                                                                                |                  |                |                                                                                  |
|                                                   |                                                                                                                                                                                                                                                                |                  |                |                                                                                  |
|                                                   |                                                                                                                                                                                                                                                                |                  |                |                                                                                  |
| <b>Patient Information and CVC Care Practices</b> |                                                                                                                                                                                                                                                                |                  |                |                                                                                  |
| 1                                                 | Patient's location/room number(s)                                                                                                                                                                                                                              |                  |                |                                                                                  |
| 2                                                 | Date of last CVC dressing change and skin condition at insertion site at that time/port access                                                                                                                                                                 |                  |                |                                                                                  |
| 3                                                 | Estimated number of CVC system entries for each 24-hour period for 72-hours prior to infection date                                                                                                                                                            |                  |                |                                                                                  |
| 4                                                 | A 30-second scrub followed by 30-second air dry with 2% CHG/70% alcohol was used to access the CVC hub/ports located below the level of the IV pump                                                                                                            |                  |                |                                                                                  |
|                                                   | Yes: _____<br>No: _____ If no, please explain why: _____                                                                                                                                                                                                       |                  |                |                                                                                  |
| 5                                                 | A 70% alcohol scrub was used to access IV ports/caps located at/above the IV pump                                                                                                                                                                              |                  |                |                                                                                  |
|                                                   | Yes: _____<br>No: _____ If no, please explain why: _____                                                                                                                                                                                                       |                  |                |                                                                                  |
| 6A                                                | 48-72 hours before infection date, who accessed the CVC system (check all that apply)?                                                                                                                                                                         |                  |                |                                                                                  |
| 6B                                                | Date of last access- _____                                                                                                                                                                                                                                     |                  |                |                                                                                  |
|                                                   | ___ Floor Nurse ___ Nurse from Other Unit ___ Local MD ___ Radiation<br>___ Anesthesia ___ ED ___ Radiology Personnel ___ Family<br>___ Home care RN ___ Other<br>Recent Procedures: _____<br>(specify) _____                                                  |                  |                |                                                                                  |
| 7                                                 | Describe any mechanical problems with CVC prior to the infection date                                                                                                                                                                                          |                  |                |                                                                                  |
| 8                                                 | Have there been any problems with the CVC or IV equipment or supplies?                                                                                                                                                                                         |                  |                |                                                                                  |
| 9                                                 | Is there any additional hardware present?                                                                                                                                                                                                                      |                  |                |                                                                                  |
|                                                   | Yes (specify): _____<br>No: _____                                                                                                                                                                                                                              |                  |                |                                                                                  |
| 10                                                | Are there any significant patient factors that may have contributed to this infection?                                                                                                                                                                         |                  |                |                                                                                  |
|                                                   | ___no___ Prior + onc surveillance cx/ colonization with above organism<br>___ Mucositis ___ Diarrhea ___ Skin Lesions<br>___ GVHD: acute/ chronic; organ involvement _____<br>active/ controlled/ resolved _____<br>___ Immune suppressive agents /dose: _____ |                  |                |                                                                                  |
| 11                                                | What recent therapy has the patient had?                                                                                                                                                                                                                       |                  |                |                                                                                  |
|                                                   | BMT ___allo/ auto; day of regimen _____<br>Chemotherapy protocol: ___ ___ Most recent agents/ cycle: ___<br>XRT within the past 2 months: _____<br>Surgery in the past month (explain): _____<br>Use of Hospira tubing? ___yes ___no                           |                  |                |                                                                                  |
| 12                                                | Laboratory Findings on date of infection:                                                                                                                                                                                                                      |                  |                |                                                                                  |
|                                                   | WBC ___ ANC ___ ALC ___ rising/ falling                                                                                                                                                                                                                        |                  |                |                                                                                  |
| 13                                                | Could this infection have been prevented?                                                                                                                                                                                                                      |                  |                |                                                                                  |
|                                                   | Yes: _____ No: _____<br>Please explain why: _____                                                                                                                                                                                                              |                  |                |                                                                                  |

Completed by: Judith Ascenzi, RN, MSN, Clinical Nurse Specialist, PICU, revised by Kim Drucis, RN for CMS8 ,revised by Cindy Herpst for JHOC 8(peds onc opd)
